# Supplementary material for: Fatigue is highly prevalent in patients with COPD and correlates poorly with the degree of airflow limitation
Source: PubMed Central journal article supplement — Ther Adv Respir Dis. 2019 Sep 27;13:1753466619878128. doi: 10.1177/1753466619878128 (PMC6767724; doi:10.1177/1753466619878128), 2019-09-27
Supplement: Revision_Online_supplement_FatigueCOPD_Ther_Adv_Resp_Dis_YMJGoertz_3April2019.pdf [file Revision_Online_supplement_FatigueCOPD_Ther_Adv_Resp_Dis_YMJGoertz_3April2019.pdf]

# Online supplement

## *Therapeutic Advances in Respiratory Disease*

### Corresponding author:

Yvonne M.J. Goërtz, Department of Research and Education, Ciro, Centre of Expertise for Chronic Organ Failure, 6085 NM Horn, the Netherlands  
Email: yvonnegoertz@ciro-horn.nl

## **Fatigue is highly prevalent in patients with COPD and correlates poorly with the degree of airflow limitation**

**Yvonne M.J. Goërtz<sup>1</sup>, Martijn A. Spruit<sup>1,2,3,4</sup>, Alex J. Van 't Hul<sup>5</sup>, Jeannette B. Peters<sup>5,6</sup>, Maarten Van Herck<sup>2</sup>, Nienke Nakken<sup>1</sup>, Remco S. Djamin<sup>7</sup>, Chris Burtin<sup>2</sup>, Melissa S.Y. Thong<sup>8</sup>, Arnold Coors<sup>9</sup>, Yvonne Meertens-Kerris<sup>10</sup>, Emiel F.M. Wouters<sup>1,3</sup>, Judith B. Prins<sup>6</sup>, Frits M.E. Franssen<sup>1,3,4</sup>, Jean W.M. Muris<sup>11</sup>, Lowie E.G.W. Vanfleteren<sup>1,3,12</sup>, Mirjam A.G. Sprangers<sup>8</sup>, Daisy J.A. Janssen<sup>1,13</sup> and Jan H. Vercoulen<sup>5,6</sup>**

<sup>1</sup> Department of Research and Education, Ciro, Centre of Expertise for Chronic Organ Failure, 6085 NM Horn, the Netherlands.

<sup>2</sup> REVAL - Rehabilitation Research Center, BIOMED - Biomedical Research Institute, Faculty of Rehabilitation Sciences, Hasselt University, 3590 Diepenbeek, Belgium.

<sup>3</sup> Department of Respiratory Medicine, Maastricht University Medical Centre (MUMC+), 6229 HX Maastricht, the Netherlands.

<sup>4</sup> NUTRIM School of Nutrition and Translational Research in Metabolism, 6229 ER Maastricht, the Netherlands.

<sup>5</sup> Department of Pulmonary Disease, Radboud University Medical Center, 6525 GA Nijmegen, the Netherlands.

<sup>6</sup> Department of Medical Psychology, Radboud University Medical Center, Radboud Institute for Health Sciences, 6525 GA Nijmegen, the Netherlands.

<sup>7</sup> Department of Respiratory Medicine, Amphia Ziekenhuis, 4818 CK Breda, the Netherlands.

<sup>8</sup> Department of Medical Psychology, Amsterdam University Medical Centres, location AMC, 1105 AZ Amsterdam, the Netherlands.

<sup>9</sup> Member of the Patient Advisory Board, Radboud University Medical Center, 6525 GA Nijmegen, the Netherlands.

<sup>10</sup> Member of the Patient Advisory Board, Ciro, Centre of Expertise for Chronic Organ Failure, 6085 NM Horn, the Netherlands.

<sup>11</sup> Department of Family Medicine, CAPHRI Care and Public Health Research Institute, Maastricht University, 6229 HX Maastricht, the Netherlands.

<sup>12</sup> COPD Center, Sahlgrenska University, S-405 30 Gothenburg, Sweden.

<sup>13</sup> Centre of Expertise for Palliative Care, Maastricht University Medical Centre (MUMC+), 6229 HX Maastricht, the Netherlands.

**Table S1** Female (n=506) versus male (n=784) patients with COPD

| Characteristics - COPD                     | n                | Female COPD<br>(n=506) | n                | Male COPD<br>(n=784) | P-value |
|--------------------------------------------|------------------|------------------------|------------------|----------------------|---------|
| Age, years                                 | 506              | 62.6±9                 | 784              | 66.1±9.5             | <0.001  |
| Current smoker, n (%)                      | 476 <sup>a</sup> | 171(35.9)              | 756 <sup>m</sup> | 209(27.6)            | 0.002   |
| Pack years                                 | 89 <sup>b</sup>  | 36.5±17.1              | 105 <sup>n</sup> | 43.4±21.7            | 0.062   |
| Long term oxygen therapy, n (%)            | 89 <sup>c</sup>  | 22(24.7)               | 105 <sup>o</sup> | 32(30.5)             | 0.373   |
| Charlson comorbidity index, points         | 232 <sup>d</sup> | 2(1-3)                 | 311 <sup>p</sup> | 3(1-4)               | 0.001   |
| COPD Assessment Test, points               | 313 <sup>e</sup> | 19(14-25)              | 383 <sup>q</sup> | 19(13-24)            | 0.255   |
| Partner, n (%)                             | 486 <sup>f</sup> | 335(68.9)              | 764 <sup>r</sup> | 616(80.6)            | <0.001  |
| Education, n (%)                           | 474 <sup>g</sup> |                        | 752 <sup>s</sup> |                      | 0.138   |
| Intermediate vocational education or lower |                  | 355(74.9)              |                  | 534(71.0)            |         |
| Secondary general education or higher      |                  | 119(25.1)              |                  | 218(29.0)            |         |
| Working situation, n (%)                   | 481 <sup>h</sup> |                        | 756 <sup>t</sup> |                      | 0.836   |
| Paid work                                  |                  | 119(24.7)              |                  | 191(25.3)            |         |
| No Paid work                               |                  | 362(75.3)              |                  | 565(74.7)            |         |
| Body composition                           |                  |                        |                  |                      |         |
| BMI (kg/m <sup>2</sup> )                   | 506              | 25.6±5.5               | 784              | 26.3±4.7             | <0.001  |
| Underweight, n (%)                         | 506              | 109(21.5)              | 784              | 94(12.0)             | <0.001  |
| Normal weight, n (%)                       |                  | 153(30.2)              |                  | 231(29.5)            |         |
| Overweight, n (%)                          |                  | 147(29.1)              |                  | 308(39.3)            |         |
| Obese, n (%)                               |                  | 97(19.2)               |                  | 151(19.3)            |         |
| Spirometry                                 |                  |                        |                  |                      |         |
| FEV 1 (% predicted)                        | 506              | 56.3±18.4              | 784              | 55±19.2              | 0.182   |
| FEV 1 (Litres)                             | 506              | 1.3±0.5                | 784              | 1.7±0.7              | <0.001  |
| FVC (Litres)                               | 506              | 2.8±0.7                | 784              | 3.9±0.9              | <0.001  |
| GOLD, n (%)                                | 506              |                        | 784              |                      | 0.121   |
| I                                          |                  | 51(10.1)               |                  | 80(10.2)             |         |
| II                                         |                  | 265(52.4)              |                  | 366(46.7)            |         |
| III                                        |                  | 160(31.6)              |                  | 270(34.4)            |         |
| IV                                         |                  | 30(5.9)                |                  | 68(8.7)              |         |
| Medications in use, n                      | 89 <sup>i</sup>  | 6(4-9.5)               | 105 <sup>u</sup> | 8(5-13)              | 0.006   |
| Dyspnoea                                   |                  |                        |                  |                      |         |
| mMRC, points                               | 355 <sup>j</sup> | 2(1-3)                 | 409 <sup>v</sup> | 2(1-3)               | 0.131   |
| <2 mild dyspnoea, n (%)                    | 355 <sup>k</sup> | 144(43.0)              | 409 <sup>w</sup> | 202(49.4)            | 0.081   |
| ≥2 severe dyspnoea, n (%)                  |                  | 191(57.0)              |                  | 207(50.6)            |         |
| Fatigue                                    |                  |                        |                  |                      |         |
| CIS-Fatigue, points                        | 506              | 37(29-46)              | 784              | 34(25-43)            | <0.001  |
| Normal fatigue, n (%)                      | 506              | 104(20.6)              | 784              | 225(28.7)            | 0.001   |
| Mild fatigue, n (%)                        |                  | 127(25.1)              |                  | 208(26.5)            |         |
| Severe fatigue, n (%)                      |                  | 275(54.3)              |                  | 351(44.8)            |         |
| Exacerbations last 12 months, r            | 327 <sup>l</sup> | 1(0-2)                 | 386 <sup>x</sup> | 1(0-2)               | 0.653   |

Data are shown as mean±SD, median (IQR) or n(%). COPD, Chronic Obstructive Pulmonary Disease; BMI, Body Mass Index; FEV1 (% predicted), forced expiratory volume over 1 second of predicted; FVC, forced volume capacity; GOLD, Global Initiative for Chronic Obstructive Lung Disease; mMRC, modified Medical Research Council dyspnoea scale; CIS-Fatigue, Checklist Individual Strength subscale fatigue. <sup>a</sup>30 missing values; <sup>b</sup>417 missing values; <sup>c</sup>417 missing values; <sup>d</sup>274 missing values; <sup>e</sup>193 missing values; <sup>f</sup>20 missing values; <sup>g</sup>32 missing values; <sup>h</sup>25 missing values; <sup>i</sup>407 missing values; <sup>j</sup>151 missing values; <sup>k</sup>151 missing values; <sup>l</sup>179 missing values; <sup>m</sup>28 missing values; <sup>n</sup>679 missing values; <sup>o</sup>679 missing values; <sup>p</sup>473 missing values; <sup>q</sup>401 missing values; <sup>r</sup>20 missing values; <sup>s</sup>32 missing values; <sup>t</sup>28 missing values; <sup>u</sup>679 missing values; <sup>v</sup>375 missing values; <sup>w</sup>375 missing values; <sup>x</sup>398 missing values.

**Table S2** Female (n=97) versus male (n=102) patients without COPD

| Characteristics – non-COPD                 | n               | Female non-COPD | n               | Male non-COPD | P-value |
|--------------------------------------------|-----------------|-----------------|-----------------|---------------|---------|
|                                            |                 | (n=97)          |                 | (n=102)       |         |
| Age, years                                 | 97              | 62.2±9.8        | 102             | 63.8±9        | 0.216   |
| Current smoker, n (%)                      | 97              | 20(20.6)        | 102             | 25(24.5)      | 0.512   |
| Pack years                                 | 77 <sup>a</sup> | 13.4±20.6       | 56 <sup>e</sup> | 21.4±19.9     | 0.002   |
| Long term oxygen therapy, n (%)            | -               | -               | -               | -             | -       |
| Charlson comorbidity index, points         | 77 <sup>b</sup> | 1(0-2)          | 56 <sup>f</sup> | 0(0-2)        | 0.647   |
| COPD Assessment Test, points               | -               | -               | -               | -             | -       |
| Partner, n (%)                             | 97              | 84(86.6)        | 102             | 85(83.3)      | 0.520   |
| Education, n (%)                           | 97              |                 | 102             |               | 0.210   |
| Intermediate vocational education or lower |                 | 76(78.4)        |                 | 72(70.6)      |         |
| Secondary general education or higher      |                 | 21(21.6)        |                 | 30(29.4)      |         |
| Working situation, n (%)                   | 96 <sup>c</sup> |                 | 102             |               | 0.672   |
| Paid work                                  |                 | 28(29.2)        |                 | 27(26.5)      |         |
| No Paid work                               |                 | 68(70.8)        |                 | 75(73.5)      |         |
| Body composition                           |                 |                 |                 |               |         |
| BMI (kg/m <sup>2</sup> )                   | 97              | 27.1±5.2        | 102             | 27.9±3.8      | 0.053   |
| Underweight, n (%)                         | 97              | 8(8.2)          | 102             | 1(1.0)        | 0.020   |
| Normal weight, n (%)                       |                 | 33(34.0)        |                 | 25(24.5)      |         |
| Overweight, n (%)                          |                 | 33(34.0)        |                 | 49(48.0)      |         |
| Obese, n (%)                               |                 | 23(23.7)        |                 | 27(26.5)      |         |
| Spirometry                                 |                 |                 |                 |               |         |
| FEV 1 (% predicted)                        | 97              | 112.4±20.9      | 102             | 110.6±20.8    | 0.239   |
| FEV 1 (Litres)                             | 97              | 2.5±0.5         | 102             | 3.5±0.8       | <0.001  |
| FVC (Litres)                               | 97              | 3.3±0.7         | 102             | 4.6±1         | <0.001  |
| GOLD, n (%)                                | -               |                 | -               |               | -       |
| I                                          |                 | -               |                 | -             |         |
| II                                         |                 | -               |                 | -             |         |
| III                                        |                 | -               |                 | -             |         |
| IV                                         |                 | -               |                 | -             |         |
| Medications in use, n                      | 77 <sup>d</sup> | 2(1-5)          | 56 <sup>g</sup> | 2(1-5)        | 0.523   |
| Dyspnoea                                   |                 |                 |                 |               |         |
| mMRC, points                               | -               | -               | -               | -             | -       |
| <2 mild dyspnoea, n (%)                    | -               | -               | -               | -             | -       |
| ≥2 severe dyspnoea, n (%)                  | -               | -               | -               | -             | -       |
| Fatigue                                    |                 |                 |                 |               |         |
| CIS-Fatigue, points                        | 97              | 22(13-28)       | 102             | 19(11-26.3)   | 0.394   |
| Normal fatigue, n (%)                      | 97              | 69(71.1)        | 102             | 77(75.5)      | 0.303   |
| Mild fatigue, n (%)                        |                 | 15(15.5)        |                 | 18(17.6)      |         |
| Severe fatigue, n (%)                      |                 | 13(13.4)        |                 | 7(6.9)        |         |
| Exacerbations last 12 months, n            | -               | -               | -               | -             | -       |

Data are shown as mean±SD, median (IQR) or n(%). COPD, Chronic Obstructive Pulmonary Disease; BMI, Body Mass Index; FEV1 (% predicted), forced expiratory volume over 1 second of predicted; FVC, forced volume capacity; GOLD, Global Initiative for Chronic Obstructive Lung Disease; mMRC, modified Medical Research Council dyspnoea scale; CIS-Fatigue, Checklist Individual Strength subscale fatigue. <sup>a</sup>20 missing values; <sup>b</sup>20 missing values; <sup>c</sup>1 missing values; <sup>d</sup>20 missing values; <sup>e</sup>46 missing values; <sup>f</sup>46 missing values; <sup>g</sup>46 missing values.

**Table S3** Non-COPD control groups from the Home Sweet Home study (*n*=133) and the Adaptation study (*n*=66)

| <b>Characteristics – non-COPD</b>          | <b><i>n</i></b> | <b>Home Sweet Home<br/>(<i>n</i>=133)</b> | <b><i>n</i></b> | <b>Adaptation<br/>(<i>n</i>=66)</b> | <b>P-<br/>value</b> |
|--------------------------------------------|-----------------|-------------------------------------------|-----------------|-------------------------------------|---------------------|
| Male, <i>n</i> (%)                         | 133             | 56 (42.1)                                 | 66              | 46 (69.7)                           | <0.001              |
| Age, years                                 | 133             | 63.5±10.2                                 | 66              | 62.2±7.5                            | 0.188               |
| Current smoker, <i>n</i> (%)               | 133             | 34 (25.6)                                 | 66              | 11 (16.7)                           | 0.158               |
| Pack years                                 | 133             | 16.8±20.6                                 | -               | -                                   | -                   |
| Charlson comorbidity index, points         | 133             | 1 (0-2)                                   | -               | -                                   | -                   |
| Partner, <i>n</i> (%)                      | 133             | 119 (89.5)                                | 60 <sup>a</sup> | 50 (75.8)                           | 0.011               |
| Education, <i>n</i> (%)                    | 133             |                                           | 66              |                                     |                     |
| Intermediate vocational education or lower |                 | 112 (84.2)                                |                 | 36 (54.5)                           | <0.001              |
| Secondary general education or higher      |                 | 21 (15.8)                                 |                 | 30 (45.5)                           |                     |
| Working situation, <i>n</i> (%)            | 133             |                                           |                 |                                     | 0.183               |
| Paid work                                  |                 | 33 (24.8)                                 |                 | 22 (33.8)                           |                     |
| No Paid work                               |                 | 100 (75.2)                                |                 | 43 (66.2)                           |                     |
| Body composition                           |                 |                                           |                 |                                     |                     |
| BMI (kg/m <sup>2</sup> )                   | 133             | 27.9±4.7                                  | 66              | 26.6±4.0                            | 0.050               |
| Underweight, <i>n</i> (%)                  |                 | 6 (4.5)                                   |                 | 3 (4.5)                             | 0.202               |
| Normal weight, <i>n</i> (%)                |                 | 34 (25.6)                                 |                 | 24 (36.4)                           |                     |
| Overweight, <i>n</i> (%)                   |                 | 54 (40.6)                                 |                 | 28 (42.4)                           |                     |
| Obese, <i>n</i> (%)                        |                 | 39 (29.3)                                 |                 | 11 (16.7)                           |                     |
| Spirometry                                 |                 |                                           |                 |                                     |                     |
| FEV 1 (% predicted)                        | 133             | 111.2±23.4                                | 66              | 112.1±14.6                          | 0.290               |
| FEV 1 (Litres)                             |                 | 2.9±0.9                                   |                 | 3.4±0.6                             | <0.001              |
| FVC (Litres)                               |                 | 3.7±1.1                                   |                 | 4.4±0.8                             | <0.001              |
| Medications in use, <i>n</i>               | 133             | 2 (1-5)                                   | -               | -                                   | -                   |
| Fatigue                                    |                 |                                           |                 |                                     |                     |
| CIS-Fatigue, points                        | 133             | 24 (14.5-31.0)                            | 66              | 14 (9.8-21.3)                       | <0.001              |
| Normal fatigue, <i>n</i> (%)               |                 | 87 (65.4)                                 |                 | 59 (89.4)                           | 0.001               |
| Mild fatigue, <i>n</i> (%)                 |                 | 27 (20.3)                                 |                 | 6 (9.1)                             |                     |
| Severe fatigue, <i>n</i> (%)               |                 | 19 (14.3)                                 |                 | 1 (1.5)                             |                     |

Data are shown as mean±SD, median (IQR) or *n*(%). COPD, Chronic Obstructive Pulmonary Disease; BMI, Body Mass Index; FEV1 (% predicted), forced expiratory volume over 1 second of predicted; FVC, forced volume capacity; CIS-Fatigue, Checklist Individual Strength subscale fatigue. <sup>a</sup>6 missing values.

**Table S4** Summary of multiple regression analysis

|                           |             |                | <b>95% CI for B</b> |                    |
|---------------------------|-------------|----------------|---------------------|--------------------|
|                           | <b>Beta</b> | <b>p-value</b> | <b>Lower Bound</b>  | <b>Upper Bound</b> |
| <b>Gender</b>             | -0.208      | 0.017          | -7.788              | -0.788             |
| <b>Age</b>                | -0.270      | <0.001         | -0.496              | -0.147             |
| <b>Marital status</b>     | 0.021       | 0.735          | -3.779              | 5.349              |
| <b>Smoking status</b>     | 0.082       | 0.214          | -1.295              | 5.732              |
| <b>Pack-years</b>         | 0.012       | 0.853          | -0.059              | 0.071              |
| <b>LTOT</b>               | -0.082      | 0.268          | -5.254              | 1.471              |
| <b>Charlson</b>           | 0.052       | 0.448          | -0.601              | 1.353              |
| <b>Exacerbations</b>      | 0.133       | 0.051          | -0.003              | 1.402              |
| <b>FEV1%pred</b>          | 0.136       | 0.084          | -0.011              | 0.169              |
| <b>FVC</b>                | -0.267      | 0.003          | -4.349              | -0.934             |
| <b>Nr. of medications</b> | 0.258       | 0.002          | 0.226               | 0.947              |
| <b>mMRC</b>               | 0.324       | <0.001         | 1.409               | 3.993              |

*Beta = standardized coefficient*

**Table S5** COPD populations from the Adaptation study (*n*=165), Home Sweet Home study (*n*=194), Paloma study (*n*=293) and the outpatient population from the Amphia hospital (*n*=638)

| Characteristic COPD                        | <i>n</i> | Adaptation study<br>( <i>n</i> =165) | <i>n</i> | Home Sweet Home<br>study ( <i>n</i> =194) | <i>n</i> | Paloma study<br>( <i>n</i> =293) | <i>n</i> | Outpatient population<br>( <i>n</i> =638) | P-value |
|--------------------------------------------|----------|--------------------------------------|----------|-------------------------------------------|----------|----------------------------------|----------|-------------------------------------------|---------|
| Male, <i>n</i> (%)                         | 165      | 128 (77.6)                           | 194      | 105 (54.1)                                | 293      | 203 (69.3)                       | 638      | 348 (54.5)                                | <0.001  |
| Age, years                                 | 165      | 64.3±9.2                             | 194      | 66.0±8.7                                  | 293      | 66.6±10.1                        | 638      | 63.6±9.3                                  | <0.001  |
| Current smoker, <i>n</i> (%)               | 164      | 45 (27.4)                            | 194      | 33 (17.0)                                 | 293      | 50 (17.1)                        | 581      | 252 (43.3)                                | <0.001  |
| Pack years                                 | -        |                                      | 194      | 40.3±20.0                                 | -        |                                  | -        |                                           | -       |
| Long term oxygen therapy, <i>n</i> (%)     | -        |                                      | 194      | 54 (27.8)                                 | -        |                                  | -        |                                           | -       |
| Charlson comorbidity index, points         | -        |                                      | 194      | 2 (1-3)                                   | -        |                                  | 349      | 3 (1-4)                                   | 0.363   |
| COPD Assessment Test, points               | -        |                                      | 193      | 21 (16-26)                                | -        |                                  | 503      | 17 (12-24)                                | <0.001  |
| Partner, <i>n</i> (%)                      | 161      | 127 (78.9)                           | 194      | 177 (91.2)                                | 291      | 213 (73.2)                       | 604      | 434 (71.9)                                | <0.001  |
| Level of education, <i>n</i> (%)           | 160      |                                      | 191      |                                           | 291      |                                  | 584      |                                           | <0.001  |
| Intermediate vocational education or lower |          | 131 (81.9)                           |          | 163 (85.3)                                |          | 230 (79.0)                       |          | 365 (62.5)                                |         |
| Secondary general education or higher      |          | 29 (18.1)                            |          | 28 (14.7)                                 |          | 61 (21.0)                        |          | 219 (37.5)                                |         |
| Working status, <i>n</i> (%)               | 159      |                                      | 194      |                                           |          |                                  | 594      |                                           | <0.001  |
| Paid work                                  |          | 39 (24.5)                            |          | 17 (8.8)                                  | 290      | 60 (20.7)                        |          | 194 (32.7)                                |         |
| No Paid work                               |          | 120 (75.5)                           |          | 177 (91.2)                                |          | 230 (79.3)                       |          | 400 (67.3)                                |         |
| Body composition                           |          |                                      |          |                                           |          |                                  |          |                                           |         |
| BMI (kg/m <sup>2</sup> )                   | 165      | 25.5±4.0                             | 194      | 26.3±5.3                                  | 293      | 26.6±4.5                         | 638      | 25.8±5.4                                  | 0.018   |
| Underweight, <i>n</i> (%)                  |          | 23 (13.9)                            |          | 32 (16.5)                                 |          | 26 (8.9)                         |          | 122 (19.1)                                | 0.006   |
| Normal weight, <i>n</i> (%)                |          | 55 (33.3)                            |          | 55 (28.4)                                 |          | 89 (30.4)                        |          | 185 (29.0)                                |         |
| Overweight, <i>n</i> (%)                   |          | 63 (38.2)                            |          | 65 (33.5)                                 |          | 122 (41.6)                       |          | 205 (32.1)                                |         |
| Obese, <i>n</i> (%)                        |          | 24 (14.5)                            |          | 42 (21.6)                                 |          | 56 (19.1)                        |          | 126 (19.7)                                |         |
| Spirometry                                 |          |                                      |          |                                           |          |                                  |          |                                           |         |
| FEV 1 (% predicted)                        | 165      | 51.6±13.7                            | 194      | 47.2±17.8                                 | 293      | 57.8±20.3                        | 638      | 58.0±18.8                                 | <0.001  |
| FEV 1 (Litres)                             | 165      | 1.5±0.5                              | 194      | 1.2±0.6                                   | 293      | 1.6±0.6                          | 638      | 1.7±0.7                                   | <0.001  |
| FVC (Litres)                               | 165      | 3.6±0.9                              | 194      | 3.1±1.0                                   | 293      | 3.5±1.0                          | 638      | 3.5±1.0                                   | <0.001  |
| GOLD, <i>n</i> (%)                         | 165      |                                      | 194      |                                           | 293      |                                  | 638      |                                           |         |
| I                                          |          | 4 (2.4)                              |          |                                           |          | 42 (14.3)                        |          | 85 (13.3)                                 | <0.001  |
| II                                         |          | 82 (49.7)                            |          | 90 (46.4)                                 |          | 136 (46.4)                       |          | 323 (50.6)                                |         |

|                                        |                              |            |     |            |     |            |     |            |        |
|----------------------------------------|------------------------------|------------|-----|------------|-----|------------|-----|------------|--------|
| III                                    |                              | 71 (43.0)  |     | 65 (33.5)  |     | 93 (31.7)  |     | 201 (31.5) |        |
| IV                                     |                              | 8 (4.8)    |     | 39 (20.1)  |     | 22 (7.5)   |     | 29 (4.5)   |        |
| Medications in use, <i>n</i>           | -                            |            | 194 | 7 (5-11)   | -   |            | -   |            | -      |
| Dyspnoea                               |                              |            |     |            |     |            |     |            |        |
| mMRC, points                           | -                            |            | 194 | 3 (2-4)    |     | 550        |     | 1 (1-2)    | <0.001 |
| <2 mild dyspnoea, <i>n</i> (%)         |                              |            |     | 44 (22.7)  |     |            |     | 302 (54.9) | <0.001 |
| ≥2 severe dyspnoea, <i>n</i> (%)       |                              |            |     | 150 (77.3) |     |            |     | 248 (45.1) |        |
| Fatigue                                |                              |            |     |            |     |            |     |            |        |
| CIS-Fatigue, points                    | CIS-Fatigue, points          | 26 (19-34) | 194 | 36 (29-42) | 293 | 35 (27-43) | 638 | 37 (28-48) | <0.001 |
| Normal fatigue, <i>n</i> (%)           | Normal fatigue, <i>n</i> (%) | 88 (53.3)  |     | 35 (18.0)  |     | 70 (23.9)  |     | 136 (21.3) | <0.001 |
| Mild fatigue, <i>n</i> (%)             | Mild fatigue, <i>n</i> (%)   | 37 (22.4)  |     | 57 (29.4)  |     | 85 (29.0)  |     | 156 (24.5) |        |
| Severe fatigue, <i>n</i> (%)           | Severe fatigue, <i>n</i> (%) | 40 (24.2)  |     | 102 (52.6) |     | 138 (47.1) |     | 346 (54.2) |        |
| Exacerbations last 12 months, <i>n</i> | 0                            |            | 189 | 1 (0-3)    | 0   |            | 524 | 0 (0-2)    | <0.001 |

Data are shown as mean±SD, median (IQR) or n(%). COPD, Chronic Obstructive Pulmonary Disease; BMI, Body Mass Index; FEV1 (% predicted), forced expiratory volume over 1 second of predicted; FVC, forced volume capacity; GOLD, Global Initiative for Chronic Obstructive Lung Disease; mMRC, modified Medical Research Council dyspnoea scale; CIS-Fatigue, Checklist Individual Strength subscale fatigue.

**File S1:** Checklist Individual Strength (CIS-Fatigue score)

Radboud University Nijmegen Medical Centre, the Netherlands

Dept. of Medical Psychology

Instruction: On the next page you find 8 statements. With these statements we wish to get an impression of how you have felt during the last twee weeks.

Yes, that is  
true

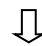

No, that is  
not true

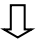

|                                                      |  |  |  |  |  |  |  |
|------------------------------------------------------|--|--|--|--|--|--|--|
| 1. I feel tired.                                     |  |  |  |  |  |  |  |
| 2. Physically I feel exhausted.                      |  |  |  |  |  |  |  |
| 3. I feel fit.                                       |  |  |  |  |  |  |  |
| 4. I feel powerless.                                 |  |  |  |  |  |  |  |
| 5. I am rested.                                      |  |  |  |  |  |  |  |
| 6. Physically I feel I am in a bad condition.        |  |  |  |  |  |  |  |
| 7. I tire easily.                                    |  |  |  |  |  |  |  |
| 8. Physically I feel I am in an excellent condition. |  |  |  |  |  |  |  |
